# Supplementary material for: Physical property exploration of highly oriented V2O5 thin films prepared by electron beam evaporation
Source: Royal Society of Chemistry journal article supplement (doi:10.1039/c5nj01582k), 2015-01-01
Supplement: c5nj01582k1.pdf [file c5nj01582k1.pdf]

Electronic Supporting Information

## **Physical Properties Exploration of Highly Oriented V<sub>2</sub>O<sub>5</sub> Thin Films Prepared by Electron Beam Evaporation**

**Shrividhya Thiagarajan<sup>a</sup>, Mahalingam Thaiyan<sup>b</sup> and Ravi Ganesan<sup>a\*</sup>**

<sup>a</sup>School of Physics, Alagappa University, Karaikudi, India-630004

<sup>b</sup>Department of Electrical and Computer Engineering, Ajou University, South Korea, Suwon 443749

\*Author for correspondence (e-mail: [gravicrc@gmail.com](mailto:gravicrc@gmail.com); [raviganesa@rediffmail.com](mailto:raviganesa@rediffmail.com))

Telephone: +91-04565-225206; Fax: +91-04565-225202)

**Table S1 Frequency assignment for Micro-Raman data**

| <b>Frequency<br/>(cm<sup>-1</sup>)</b> | <b>Assignment</b>                                                                                                                             | <b>Modes</b>    |
|----------------------------------------|-----------------------------------------------------------------------------------------------------------------------------------------------|-----------------|
| 285                                    | Bending vibration of V=O bond ( $d_1$ )                                                                                                       | B <sub>2g</sub> |
| 305                                    | z direction motion of intra ladder oxygen atoms                                                                                               | A <sub>g</sub>  |
| 400                                    | Bending vibration of V=O bond ( $d_1$ )                                                                                                       | A <sub>g</sub>  |
| 483                                    | Bending vibration of V–O–V bond ( $d_2$ ) related to the deformation involving displacement of the bridging oxygen atom along the z-direction | B <sub>2g</sub> |
| 525                                    | Stretching vibration of V-O-V bridging bond ( $d_4$ )                                                                                         | A <sub>g</sub>  |
| 701                                    | Asymmetric bond stretching of V-O-V bridging bond ( $d_3$ )                                                                                   | B <sub>1g</sub> |
| 996                                    | Stretching of vanadium atoms connected to oxygen atoms V=O bond ( $d_1$ ) (terminal oxygen)                                                   | A <sub>g</sub>  |

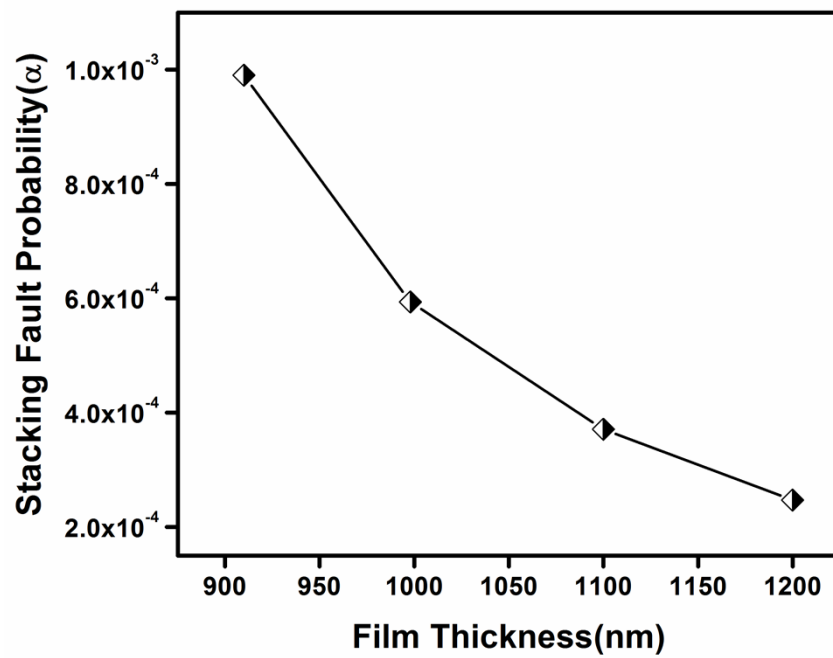

**Figure S1.** A plot of stacking fault probability of  $V_2O_5$  thin films prepared at various thickness.

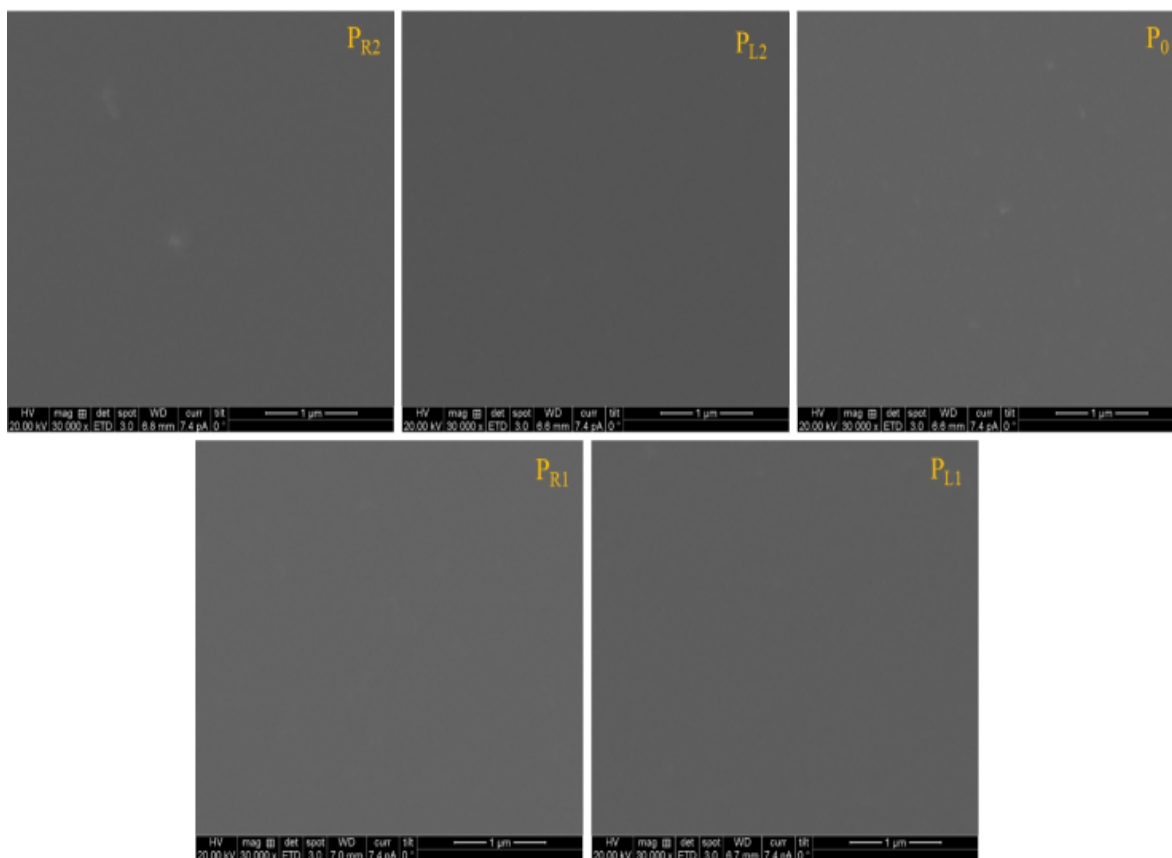

**Figure S2.** SEM micrographs of  $V_2O_5$  thin films prepared at various thickness by adjusting substrate positions

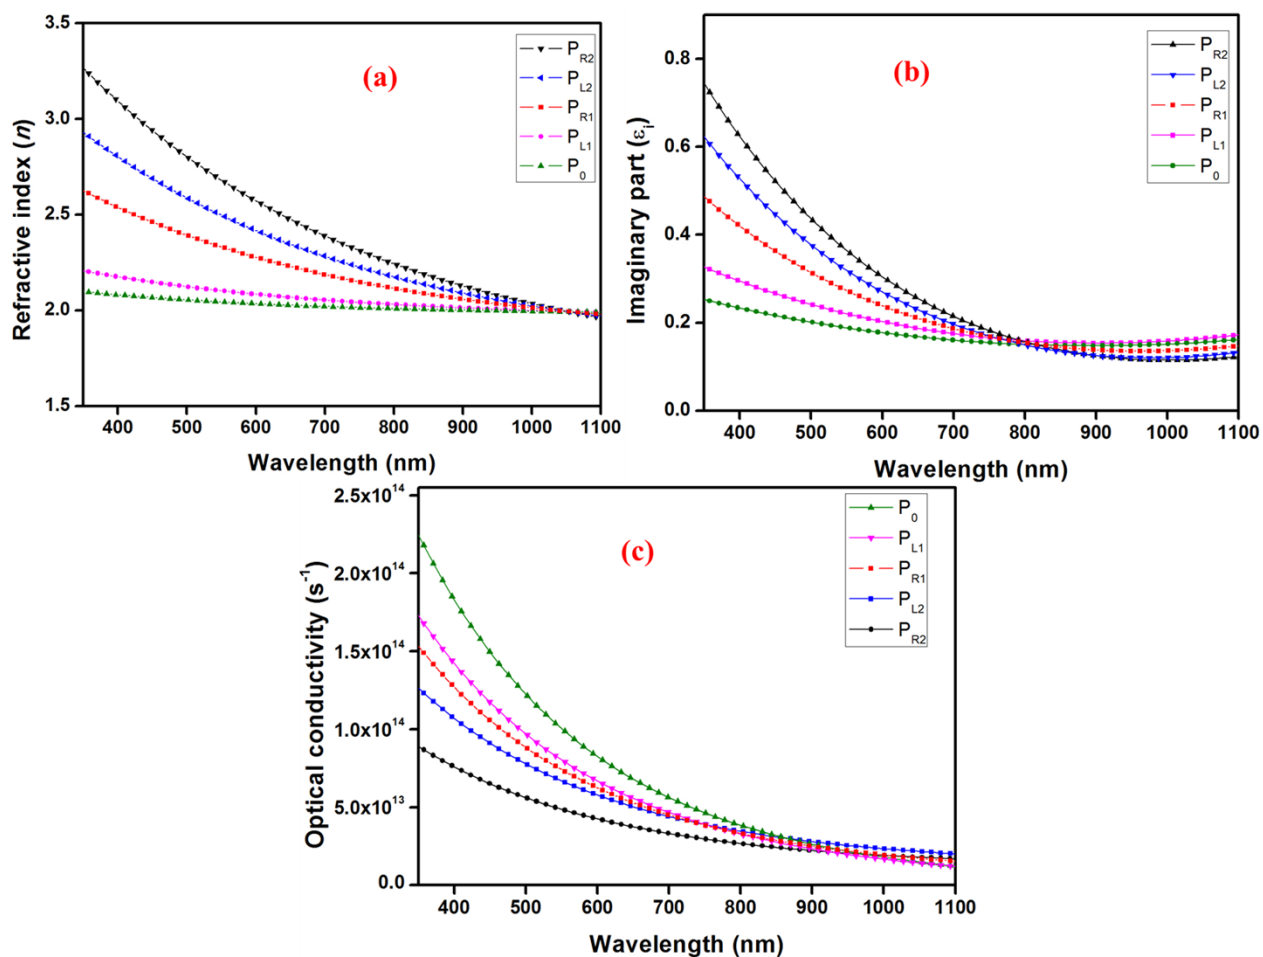

**Figure S3. (a&b)** The variation of dielectric constant as a function of wavelength of  $V_2O_5$  thin films deposited at different thickness by adjusting substrate positions; **(c)** The estimated optical conductivity variations using refractive index and absorption coefficient values for  $V_2O_5$  thin films.

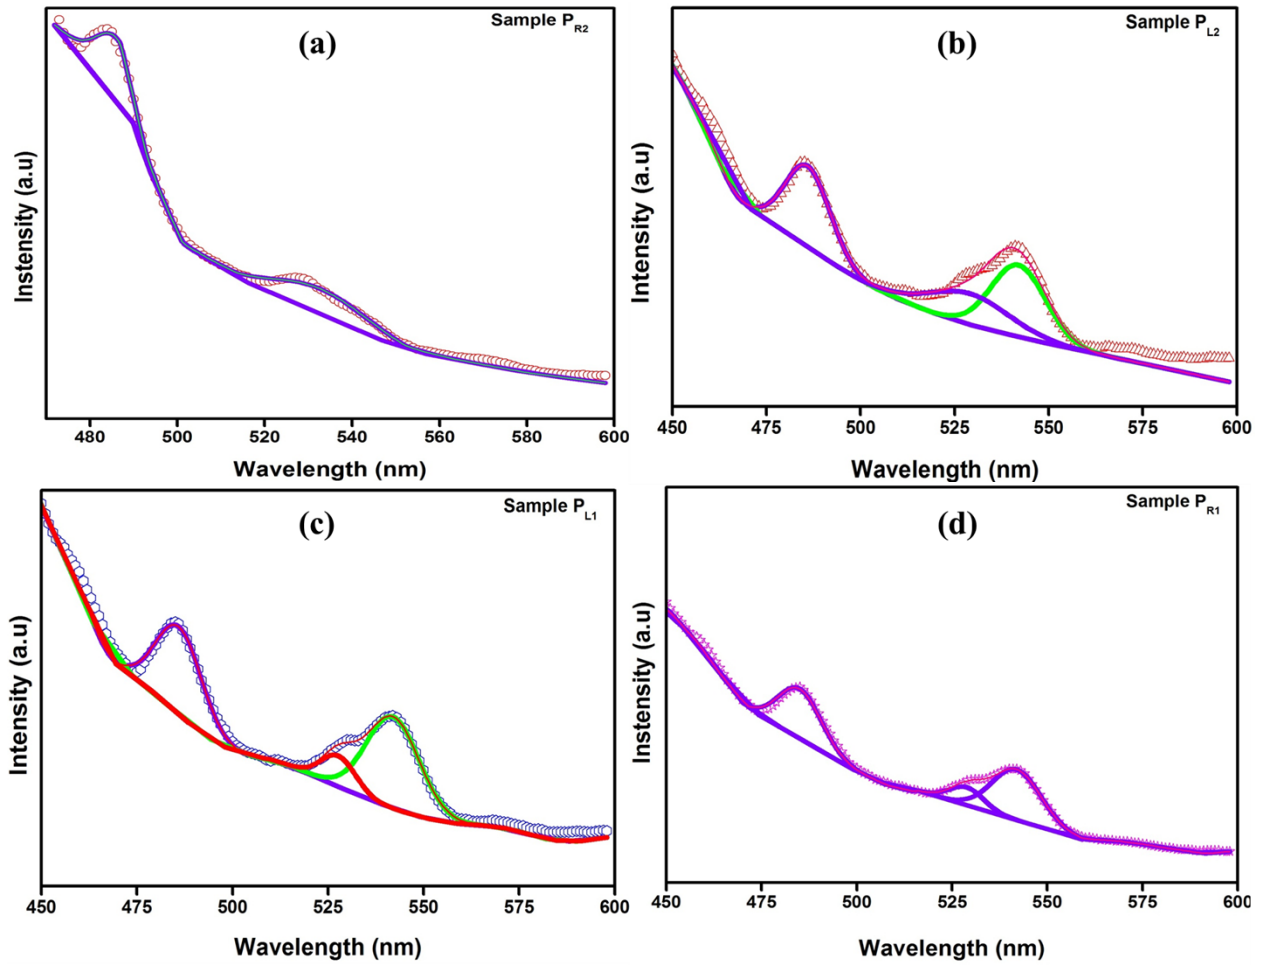

**Figure S4.** Gaussian resolved PL spectra of  $V_2O_5$  thin films deposited at different thickness by adjusting substrate positions (a)  $P_{R2}$ ; (b)  $P_{L2}$ ; (c)  $P_{L1}$  and (d)  $P_{R1}$ .
